# Supplementary material for: Effect of the Donor/Acceptor Size on the Rate of Photo-Induced Electron Transfer
Source: MDPI journal article supplement (doi:10.3390/photochem2040059), 2022-11-30
Supplement: s1 [file s1]

Archive with 1 entries (1 files):
- photochem-2035353-supplementary.pdf
